# Supplementary material for: The effect of water on the binding of glycosaminoglycan saccharides to hydroxyapatite surfaces: a molecular dynamics study
Source: Royal Society of Chemistry journal article supplement (doi:10.1039/c5cp02630j), 2015-01-01
Supplement: c5cp02630j1.pdf [file c5cp02630j1.pdf]

ASSOCIATED CONTENT

**Supporting Information.** Potential parameters used in this work. Adsorption positions of GlcA and GalNAc-4s on to the dry surfaces. Average structures of the monomers in water. RDF graphs. This material is available free of charge via the Internet at <http://pubs.acs.org>.

**Table S1** Parameters for HAP and water.

| Species                                  | Charge (e)                     |                          | Spring constant (ev Å <sup>-2</sup> ) |
|------------------------------------------|--------------------------------|--------------------------|---------------------------------------|
|                                          | core                           | shell                    |                                       |
| Ca                                       | +2.000                         | -                        | -                                     |
| P                                        | +1.180                         | -                        | -                                     |
| Phosphate O (O2)                         | +0.587                         | -1.632                   | 507.4000                              |
| Hydroxyl O (O1)                          | +0.90                          | -2.300                   | 74.92038                              |
| H                                        | +0.400                         | -                        | -                                     |
| HW                                       | +0.417                         |                          |                                       |
| OW                                       | -0.8340                        |                          |                                       |
| <b>Buckingham Potential</b>              | <b>A (ev)</b>                  | <b>ρ (Å)</b>             | <b>C (ev Å<sup>6</sup>)</b>           |
| Ca—O2 <sub>shell</sub>                   | 1550.00                        | 0.29700                  | 0.0                                   |
| Ca—O1 <sub>shell</sub>                   | 1250.00                        | 0.3437                   | 0.0                                   |
| O2 <sub>shell</sub> —O2 <sub>shell</sub> | 16372.00                       | 0.2130                   | 3.47                                  |
| O1 <sub>shell</sub> —O1 <sub>shell</sub> | 22764.00                       | 0.1490                   | 6.97                                  |
| O2 <sub>shell</sub> —O1 <sub>shell</sub> | 22764.00                       | 0.1490                   | 4.92                                  |
| H—O2 <sub>shell</sub>                    | 312.000                        | 0.2500                   | 0.0                                   |
| H—O1 <sub>shell</sub>                    | 312.000                        | 0.2500                   | 0.0                                   |
| Ca—OW                                    | 1237.00                        | 0.29700                  | 0.0                                   |
| H—OW                                     | 413.10                         | 0.2500                   | 0.0                                   |
| O1 <sub>shell</sub> —OW                  | 21836.50                       | 0.1490                   | 17.14                                 |
| O2 <sub>shell</sub> —OW                  | 12022.600                      | 0.2130                   | 12.09                                 |
| O1 <sub>shell</sub> —HW                  | 325.300                        | 0.2500                   | 0.0                                   |
| O2 <sub>shell</sub> —HW                  | 413.100                        | 0.2300                   | 0.0                                   |
| <b>Three-Body Potential</b>              | <b>k (ev rad<sup>-2</sup>)</b> | <b>Θ<sub>0</sub></b>     |                                       |
| O2 <sub>core</sub> —P—O2 <sub>core</sub> | 1.322626                       | 109.47                   |                                       |
| HW—OW—HW                                 | 8.672821                       | 104.52                   |                                       |
| <b>Morse potential</b>                   | <b>D (ev)</b>                  | <b>α(Å<sup>-1</sup>)</b> | <b>r<sub>0</sub> (Å)</b>              |
| P—O2 <sub>core</sub>                     | 3.4700                         | 2.030                    | 1.600                                 |
| H—O1 <sub>core</sub>                     | 7.0525                         | 3.1749                   | 0.9485                                |
| <b>Harmonic Potential</b>                | <b>k (ev Å<sup>-2</sup>)</b>   |                          | <b>r<sub>0</sub> (Å)</b>              |
| OW—HW                                    | 47.960699                      |                          | 0.957                                 |

**Table S2.** Charges of the GAGs

| GalNac-4S |            |
|-----------|------------|
| Specie    | Charge (e) |
| H1        | 0.000      |
| G_Cg      | 0.264      |
| H1        | 0.000      |
| H1        | 0.000      |
| G_Os      | -0.458     |
| G_Cg      | 0.305      |
| H2        | 0.000      |
| G_Os      | -0.408     |
| G_Cg      | 0.136      |
| H1        | 0.000      |
| G_Cg      | 0.353      |
| H1        | 0.000      |
| H1        | 0.000      |
| G_Oh      | -0.714     |
| G_Ho      | 0.427      |
| G_Cg      | 0.253      |
| H1        | 0.000      |
| G_Os      | -0.632     |
| S         | 1.577      |
| O2g       | -0.732     |
| O2g       | -0.732     |
| O2g       | -0.732     |
| G_Os      | 0.152      |
| H1        | 0.000      |
| G_Os      | -0.484     |
| G_Cg      | 0.234      |
| H1        | 0.000      |
| H1        | 0.000      |
| H1        | 0.000      |
| G_Cg      | 0.544      |
| H1        | 0.000      |
| G_Ng      | -0.686     |
| H_g       | 0.254      |
| C_g       | 0.586      |
| O_g       | -0.564     |
| G_Cg      | 0.056      |
| H1        | 0.000      |
| H1        | 0.000      |
| H1        | 0.000      |

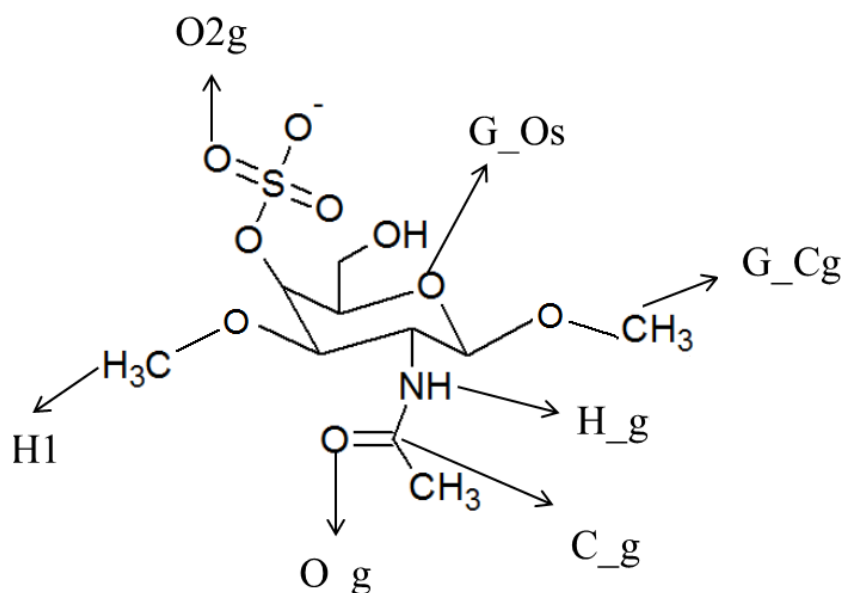

| GlcA   |            |
|--------|------------|
| Specie | Charge (e) |
| H1     | 0.000      |
| G_Cg   | 0.264      |
| H1     | 0.000      |
| H1     | 0.000      |
| G_Os   | -0.458     |
| G_Cg   | 0.251      |
| H2     | 0.000      |
| G_Os   | -0.413     |
| G_Cg   | 0.075      |
| H1     | 0.000      |
| C_g    | 0.893      |
| O2g    | -0.818     |
| O2g    | -0.818     |
| G_Cg   | 0.267      |
| H1     | 0.000      |
| G_Os   | -0.552     |
| G_Cg   | 0.248      |
| H1     | 0.000      |
| H1     | 0.000      |
| H1     | 0.000      |
| G_Cg   | 0.266      |
| H1     | 0.000      |
| G_Oh   | -0.701     |
| G_Ho   | 0.403      |
| G_Cg   | 0.411      |
| H1     | 0.000      |
| G_Oh   | -0.740     |
| G_Ho   | 0.422      |

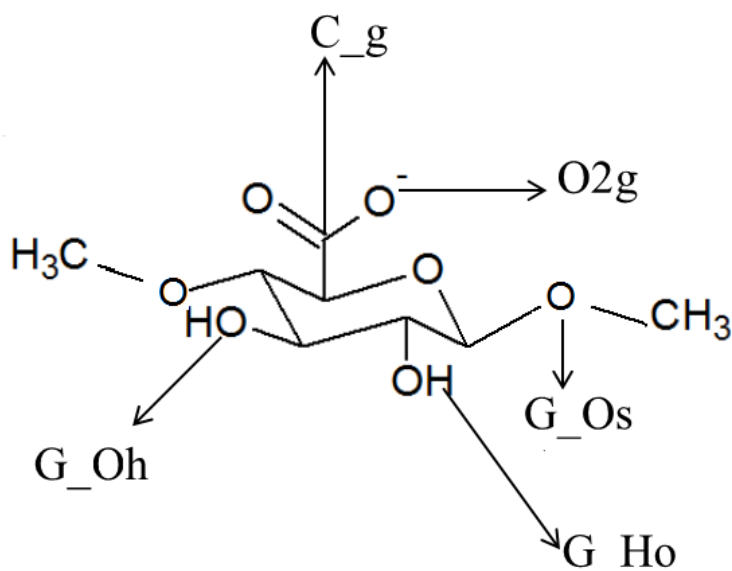

**Table S3.** Additional non-bonded parameters

| Van der Waals Parameters |           |                              |
|--------------------------|-----------|------------------------------|
| Specie                   | $r_i$ (Å) | $\epsilon_i$ (eV/23.0451mol) |
| Ca                       | 1.7131    | 0.4598                       |
| P                        | 2.1000    | 0.2000                       |
| O2                       | 1.6612    | 0.2100                       |
| O1                       | 1.7210    | 0.2104                       |
| H                        | 0.0000    | 0.0000                       |

For the interactions between HAP surfaces and the GAGs we also have used a Lennard-Jones. The Lennard-Jones can be expressed as:

$$U = \varepsilon_{ij} \left[ \left( \frac{R_{ij}}{r} \right)^{12} - \left( \frac{R_{ij}}{r} \right)^6 \right]$$

where  $\varepsilon_{ij} = \sqrt{\varepsilon_i \varepsilon_j}$  and  $R_{ij} = r_i + r_j$

**Table S4** Hydroxyapatite lattice parameters and bulk modulus (Hill)

| Parameter           | de Leeuw et al | % $\Delta_{\text{DFT}}$ | % $\Delta_{\text{exp}}$ |
|---------------------|----------------|-------------------------|-------------------------|
| a=b (Å)             | 9.42           | 1.69                    | -0.02                   |
| c (Å)               | 6.88           | 0.72                    | -0.07                   |
| $\alpha=\beta$ (°)  | 90.0           | 0.0                     | 0.0                     |
| $\gamma$ (°)        | 120.0          | 0.0                     | 0.0                     |
| V (Å <sup>3</sup> ) | 528.61         | 4.27                    | -0.09                   |
| B <sub>H</sub>      | 89.75          | -14.88                  | -7.97                   |

Table S4 shows a comparison of the cell parameters and Bulk modulus of HAP obtained with this model and more computationally expensive DFT method (Bhat et al., 2014), and experimental data (Katz and Ukraincik, 1971)

Bhat, S. S., Waghmare, U. V. & Ramamurty, U. *Crystal Growth & Design*, 2014, 14, 3131-3141.

Katz, J. L. & Ukraincik, K.. *Journal of Biomechanics*, 1971, 4, 221-227.

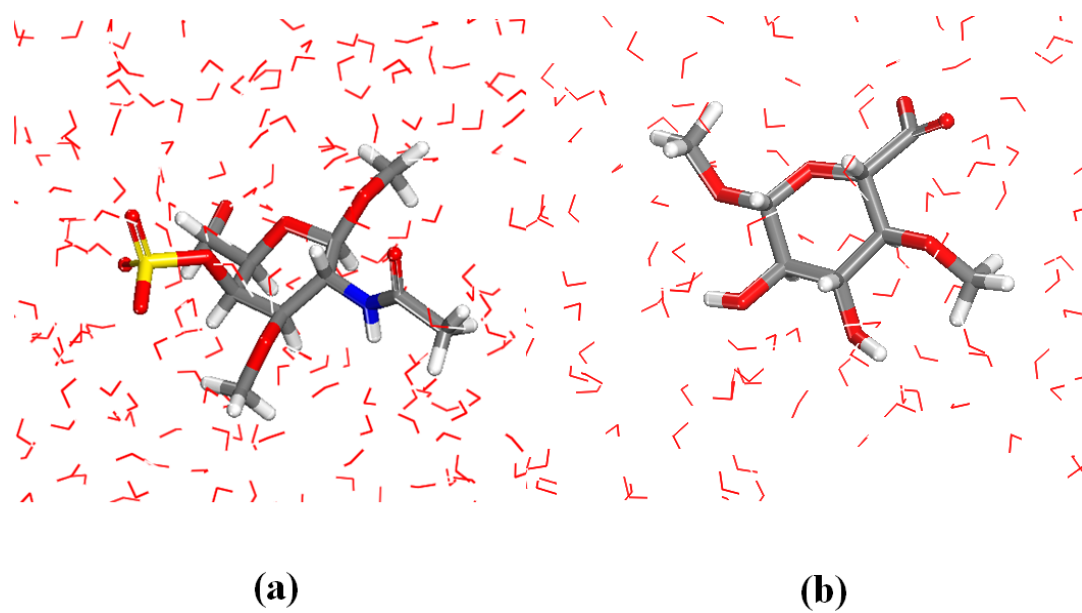

**Figure S4.** Monomers of Ch4S in water. **(a)** GalNAc-4S **(b)** GlcA. Oxygen in red, Hydrogen in white, Sulfur in yellow, Nitrogen in blue, Carbon in gray.

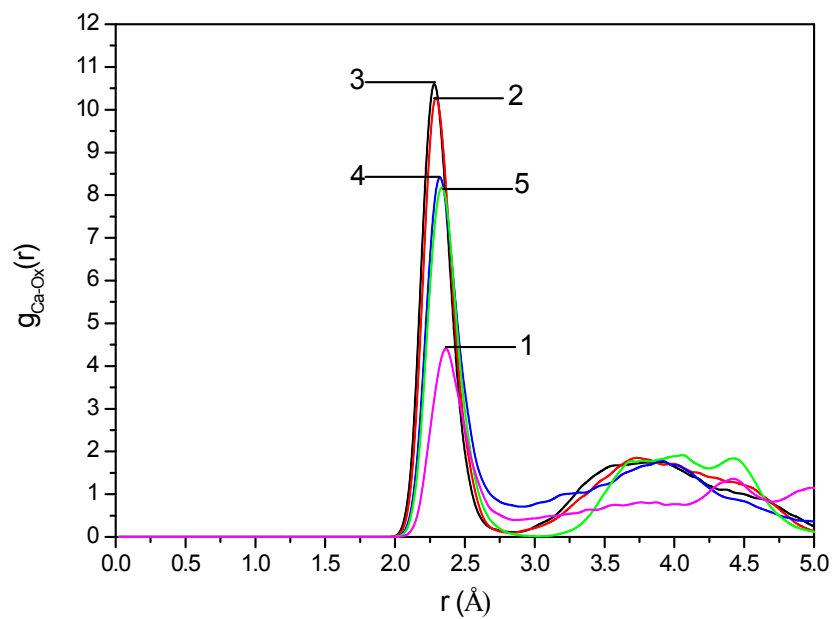

**Figure S7.** RDF  $\text{Ca}^{2+}\text{--O}_{\text{carboxylate}}$  for GlcA on the flat (010) surface. All studied configurations showed intense interactions of carboxylate oxygen atoms with calcium, where configuration 2 shows the strongest binding to the surface.

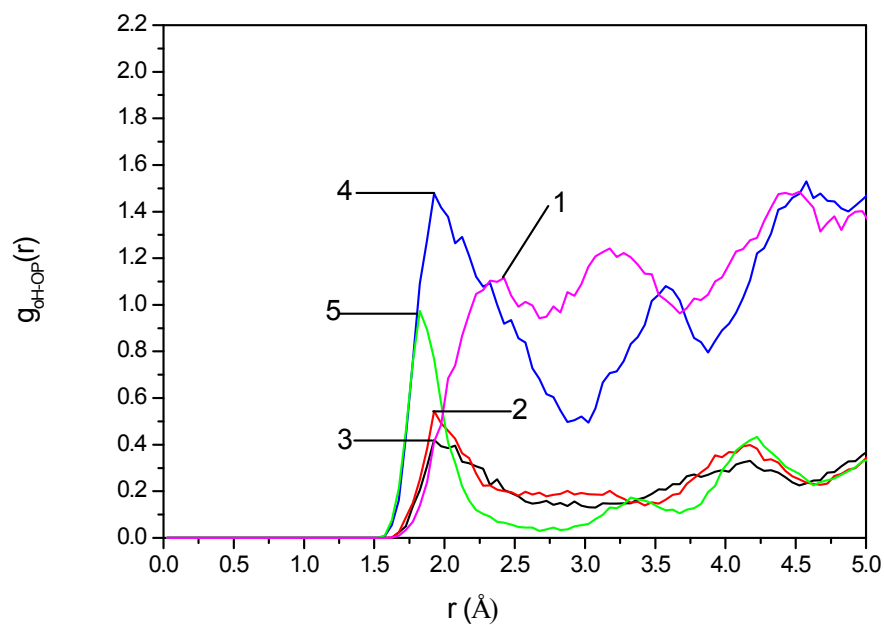

**Figure S8.** RDF  $\text{H}_{\text{hydroxy}}\text{--O}_{\text{phosphate}}$  for GlcA on the flat (010) surface. All configurations present a peak around 2.0–2.25 Å, indicating hydrogen-bond formation.

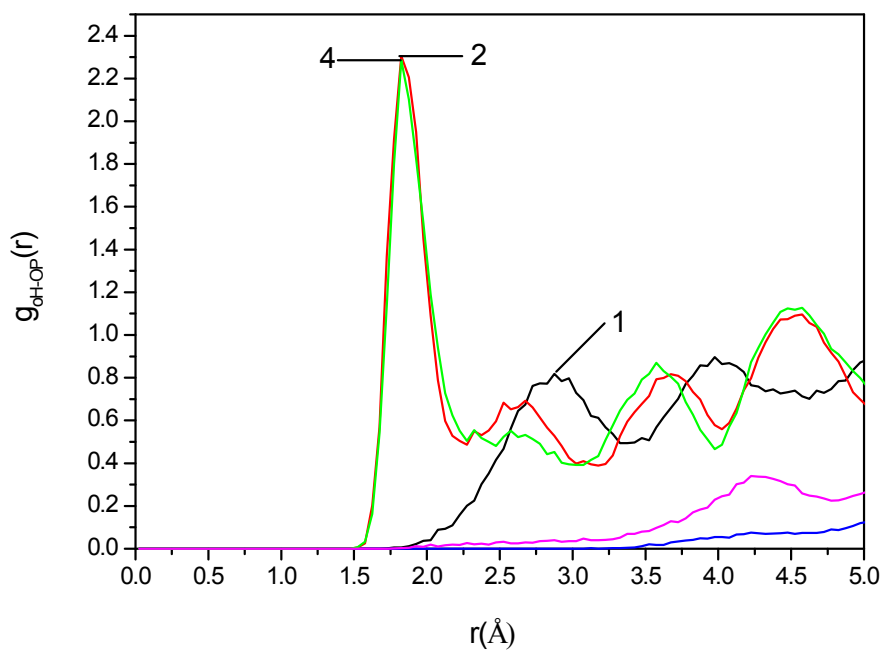

**Figure S9.** RDF  $\text{H}_{\text{hydroxy}}-\text{O}_{\text{phosphate}}$  for GlcA on the crenellated (010) surface. Only three configurations present a peak up to 2.75 Å, indicating hydrogen-bond formation.

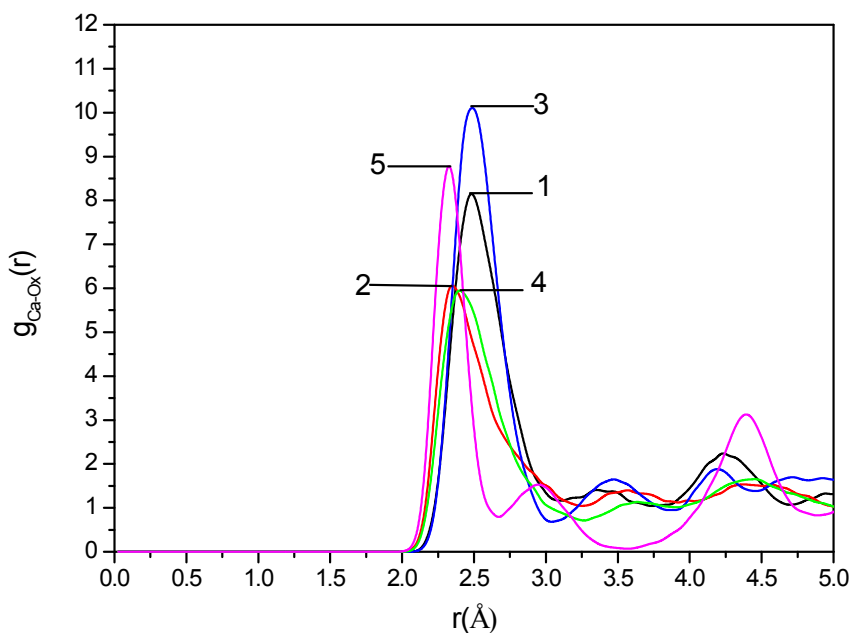

**Figure S10.** RDF  $\text{Ca}^{2+}-\text{O}_{\text{carboxylate}}$  for GlcA on the crenellated (01Error!0) surface. The position of the first peak is shifted beyond 2.5 Å, for configurations 1 and 3 with lowest positive adsorption energies.

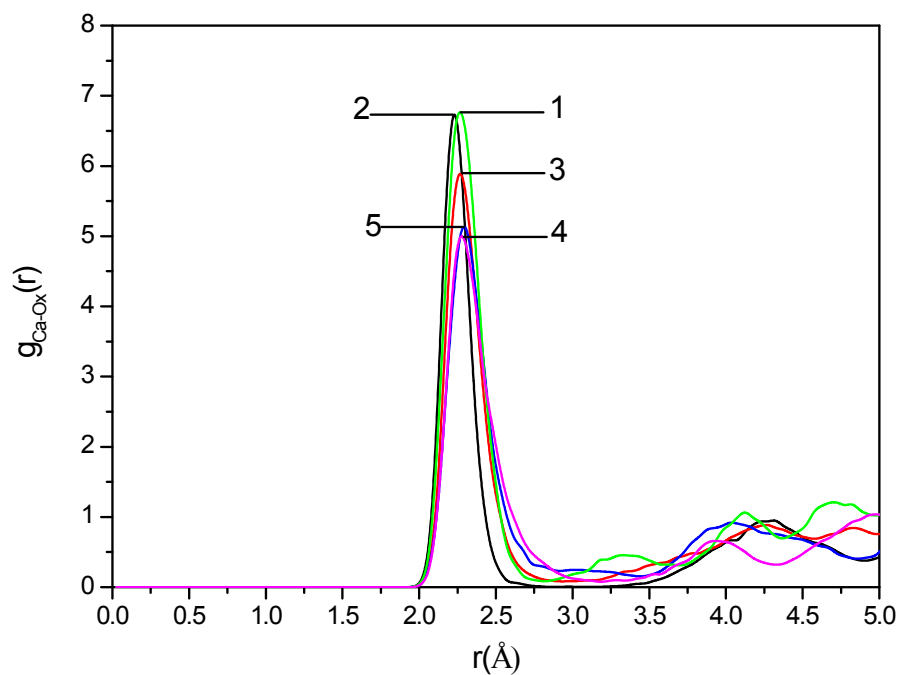

**Figure S11.** RDF  $\text{Ca}^{2+}-\text{O}_{\text{carboxylate}}$  GlcA flat (0001) surface. The numbers indicate the configuration in Table 1.



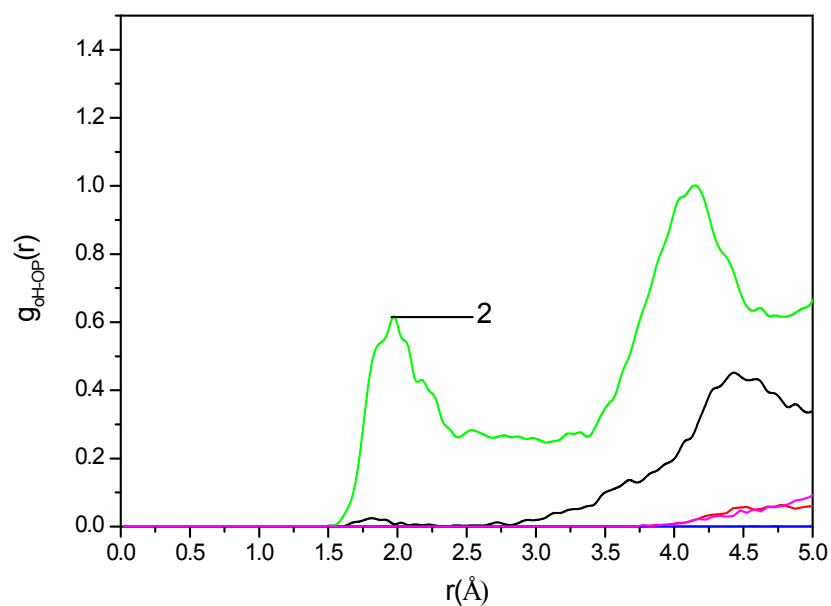

**Figure S12.** RDF  $H_{\text{hydroxy}}-O_{\text{phosphate}}$  for GalNAc-4S on the flat (01Error!0) surface. The GalNAc-4S is only forming hydrogen-bonds in configuration 2

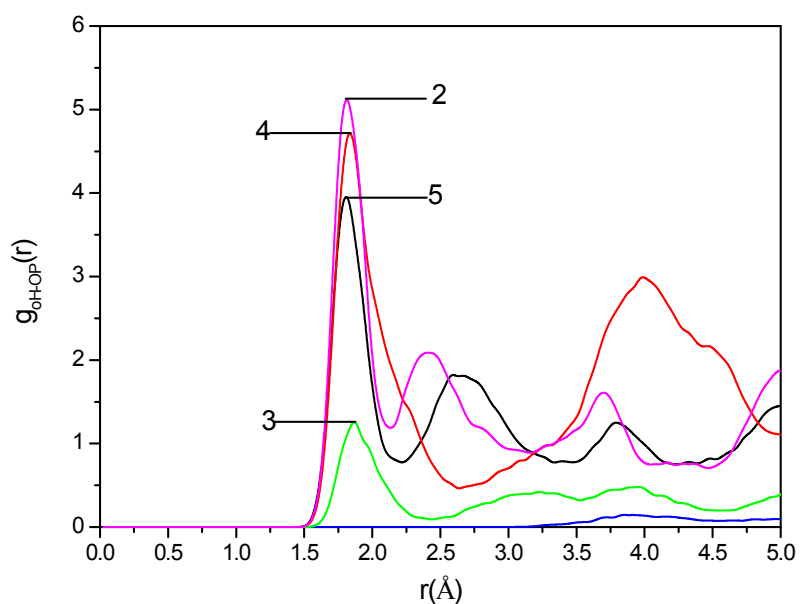

**Figure S13.** RDF  $H_{\text{hydroxy}}-O_{\text{phosphate}}$  for GalNAc-4S on the crenellated (01Error!0) surface. The GalNAc-4S is not forming hydrogen-bonds with the surface in configuration 1.

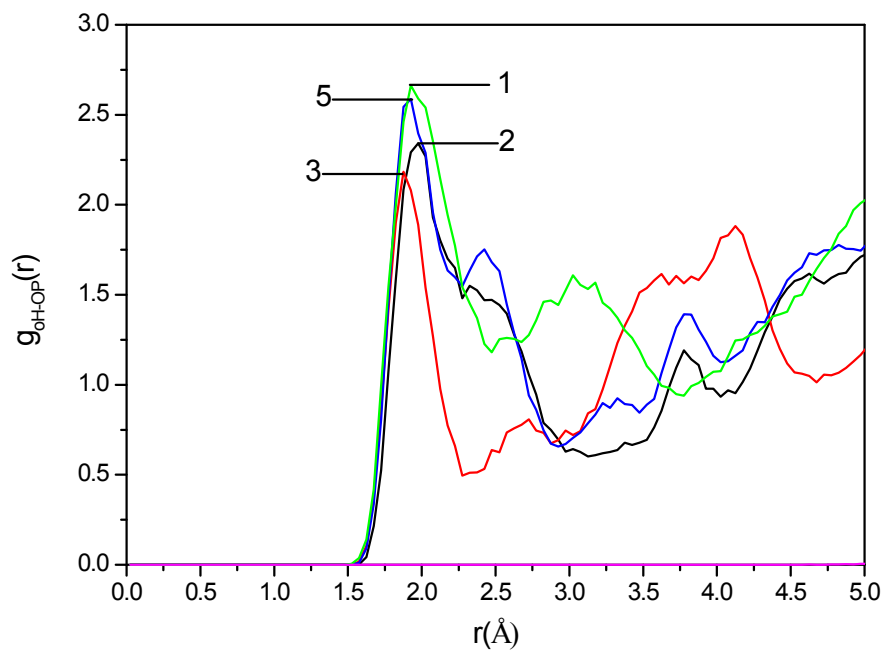

**Figure S14** RDF  $H_{\text{hydroxy}}-O_{\text{phosphate}}$  for GlcA on the (0001) surface. The hydroxy groups of the GAG interact with the surface forming hydrogen bonds

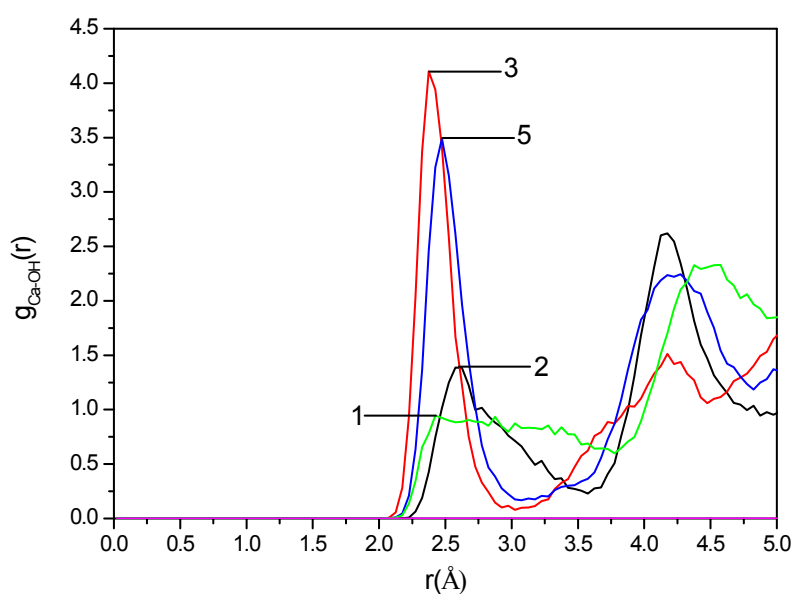

**Figure S15** RDF  $Ca^{2+}-O_{\text{hydroxy}}$  for GlcA on the (0001) surface. The hydroxy groups of the GAG replace the missing  $Ca^{2+}-O_w$  interactions.
